# Supplementary material
Source: Royal Society of Chemistry journal article supplement (doi:10.1039/d6qm00318d)
Supplement: d6qm00318d1.pdf [file d6qm00318d1.pdf]

## **Supplementary Information**

### **Electrochemical Kinetics and Energy Storage Performance of 3D**

### **Hierarchical CuFeS<sub>2</sub>@rGO Micro-flower Electrodes**

Parul<sup>a</sup>, Surjit Sahoo<sup>b</sup>, Satyajit Ratha<sup>c</sup>, Saroj Kumar Nayak<sup>a\*</sup>

*<sup>a</sup>Indian Institute of Technology Bhubaneswar, Argul, Jatani, Khordha, Odisha-752050, India*

*<sup>b</sup>Centre for Interdisciplinary Research, SRM University-AP, Amaravati, Andhra Pradesh  
522240, India*

*<sup>c</sup>Institute of Technical Education and Research, S'O'A Deemed to be University,  
Bhubaneswar, Odisha, India - 751030*

\*Email address: [nayaks@iitbbs.ac.in](mailto:nayaks@iitbbs.ac.in)

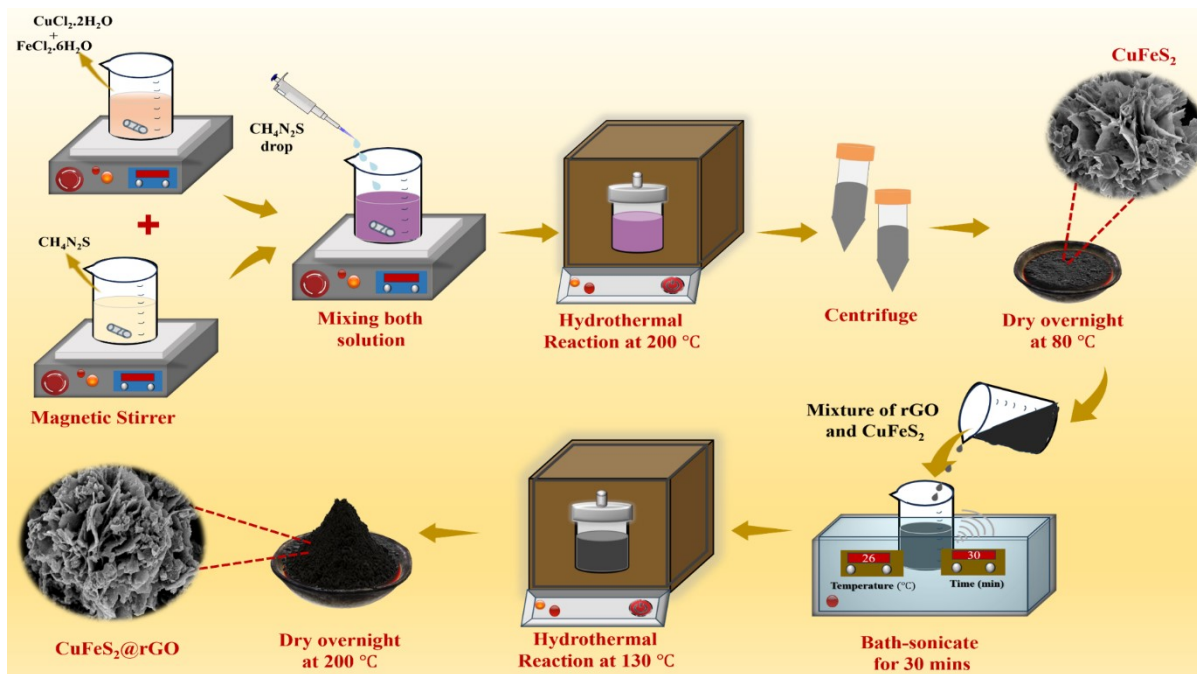

**Figure S1** Schematic illustration of the preparation process for copper iron sulphide and its reduced graphene oxide composite.

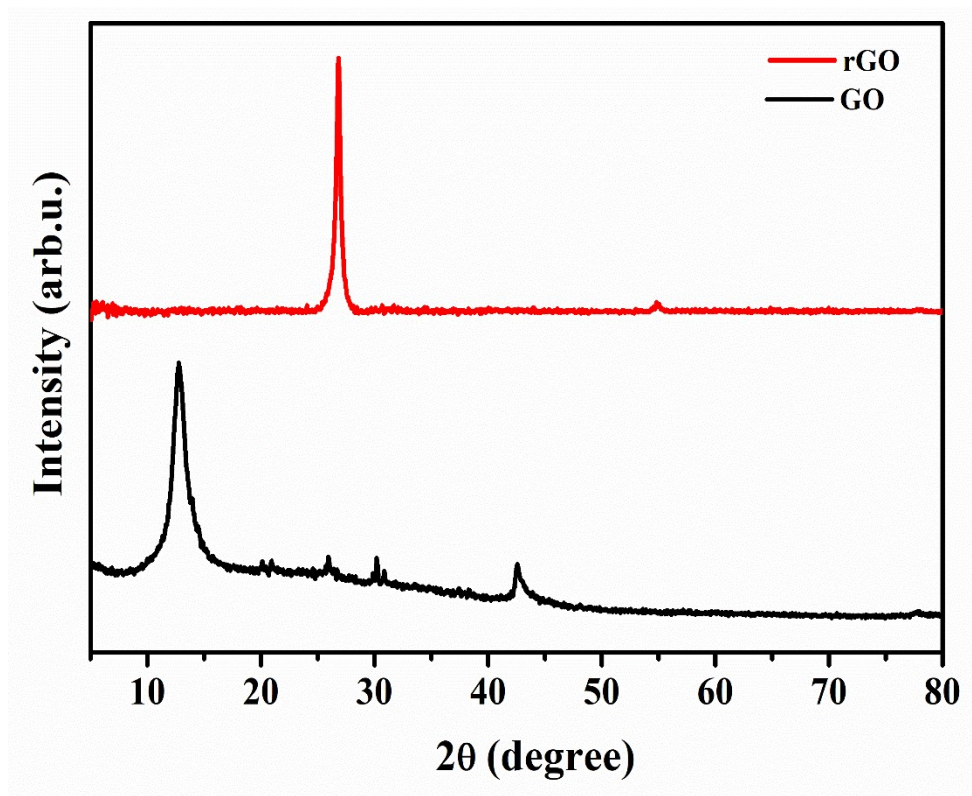

**Figure S2** Comparison of Powder XRD for Graphene Oxide and Reduced Graphene Oxide.

## 1.1 Crystallographic information from XRD:

Furthermore, we calculated the d-spacing using Bragg's law (**equation 1**) to verify the lattice parameters a, b, and c.

$$n\lambda = 2d \sin\theta$$

or

$$d = \frac{n\lambda}{2\sin\theta} \quad \dots (1)$$

where d is the interplanar spacing (Å), n is 1 (diffraction order),  $\theta$  is the peak position (in radians), and  $\lambda$  is 1.5406 Å. We have used **equation 2** for the tetragonal phase. ( $a = b \neq c$ ), based on the tetragonal lattice relationship: <sup>S19</sup>

$$\frac{1}{d^2} = \frac{h^2 + k^2}{a^2} + \frac{l^2}{c^2} \quad \dots (2)$$

This allowed us to calculate the lattice constant and d-spacing, which are all shown in the supplementary information (SI) in **Tables S1** and **S2**. The lattice parameters a and b were determined to be 5.2506 Å, and the lattice parameter c was calculated to be approximately 10.50 Å. This indicates that the calculated values of a, b, and c closely match the JCPDS file no. 00-035-0752 (standard value), indicating that the expected crystal structure was successfully formed.

The diffraction peak shows broadening, suggesting the nanoscale nature of the CuFeS<sub>2</sub> crystalline. **Equation 3**, also known as the Scherrer equation<sup>S18</sup>, is used to calculate the crystalline size of CuFeS<sub>2</sub>:

$$D = \frac{k\lambda}{\beta \cos\theta} \quad \dots (3)$$

where  $k$  is a shape factor (constant) of 0.9,  $D$  represents the crystalline size,  $\lambda$  is the XRD wavelength (0.15 nm for  $\text{CuK}\alpha$  radiation),  $\beta$  indicates the peak broadening at half maximum intensity, and  $\theta$  is the Bragg angle or peak position. Using the Scherrer equation, the crystalline size has been determined to be 18.74 nm.

**Table S1** Calculated d-spacing values at various peak positions.

| Sr. no. | Peak position          | Interplanar spacing | Miller indices  |
|---------|------------------------|---------------------|-----------------|
|         | $2\theta$ ( $^\circ$ ) | $d$ ( $\text{Å}$ )  | (hkl)           |
| 1.      | 29.44                  | 3.03153             | 112 (for c)     |
| 2.      | 49.035                 | 1.8564              | 220 (for a = b) |
| 3.      | 57.97                  | 1.5896              | 312             |
| 4.      | 58.63                  | 1.57329             | 116             |
| 5.      | 79.47                  | 1.2050              | 316             |

**Table S2** Comparison of Actual and Calculated Lattice Parameters.

| Sr. no. | Lattice parameters ( $\text{Å}$ ) | Actual values<br>(JCPDF file 01-035-0752) | Calculated values |
|---------|-----------------------------------|-------------------------------------------|-------------------|
| 1.      | a                                 | 5.2893                                    | 5.2506            |
| 2.      | b                                 | 5.2893                                    | 5.2506            |
| 3.      | c                                 | 10.4230                                   | 10.5000           |

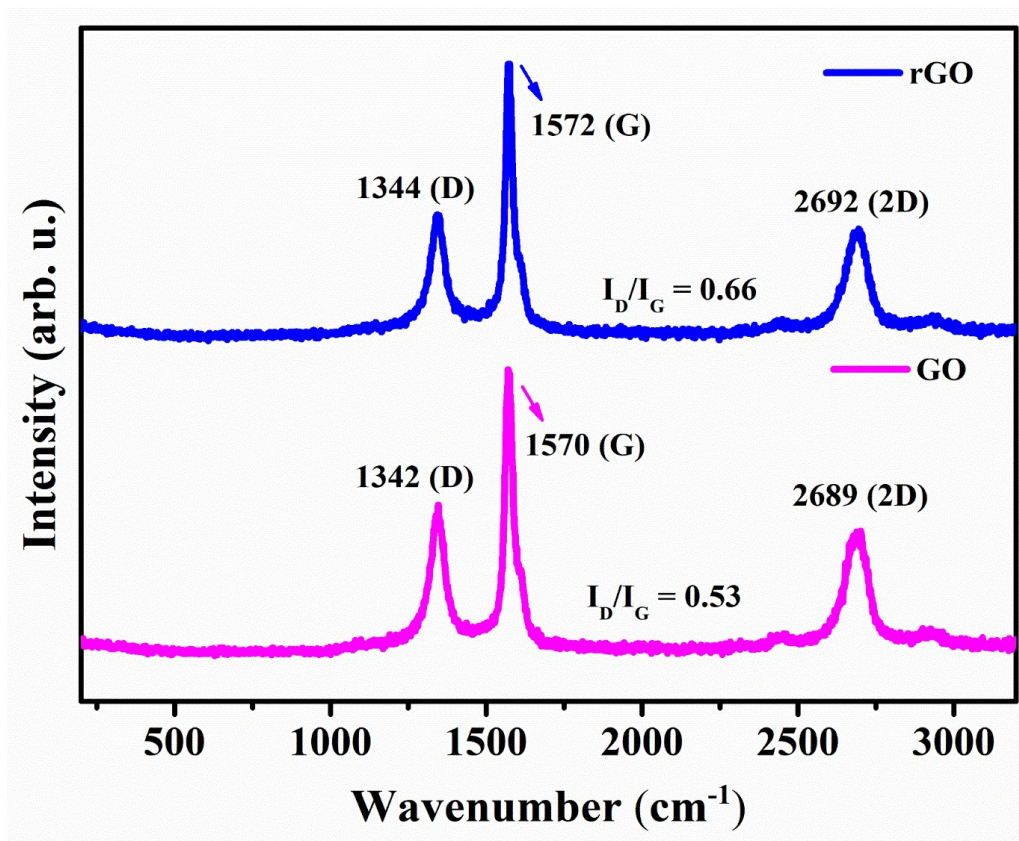

Figure S3 Raman Spectroscopy for Graphene Oxide and Reduced Graphene Oxide.

**Table S3** Detailed summary of Raman study for GO, rGO, CuFeS<sub>2</sub>, and CuFeS<sub>2</sub>@rGO.

| Sample name             | Peak 1 (P1) cm <sup>-1</sup> | Peak 2 (P2) cm <sup>-1</sup> | Peak 3 (P3) cm <sup>-1</sup> | Peak 3 (P4) cm <sup>-1</sup> | D-band position in cm <sup>-1</sup> | G-band position in cm <sup>-1</sup> | 2D-band position in cm <sup>-1</sup> | I <sub>D</sub> /I <sub>G</sub> | L <sub>a</sub> (nm) |
|-------------------------|------------------------------|------------------------------|------------------------------|------------------------------|-------------------------------------|-------------------------------------|--------------------------------------|--------------------------------|---------------------|
| GO                      | -                            | -                            | -                            | -                            | 1344                                | 1572                                | 2692                                 | 0.53                           | 36.3                |
| rGO                     | -                            | -                            | -                            | -                            | 1342                                | 1570                                | 2689                                 | 0.66                           | 29.1                |
| CuFeS <sub>2</sub>      | 290                          | 316.0                        | 347                          | 470                          | -                                   | -                                   | -                                    | -                              | -                   |
| CuFeS <sub>2</sub> @rGO | 291                          | 316.5                        | 347                          | 471                          | 1347                                | 1574                                | 2698                                 | 0.75                           | 25.6                |

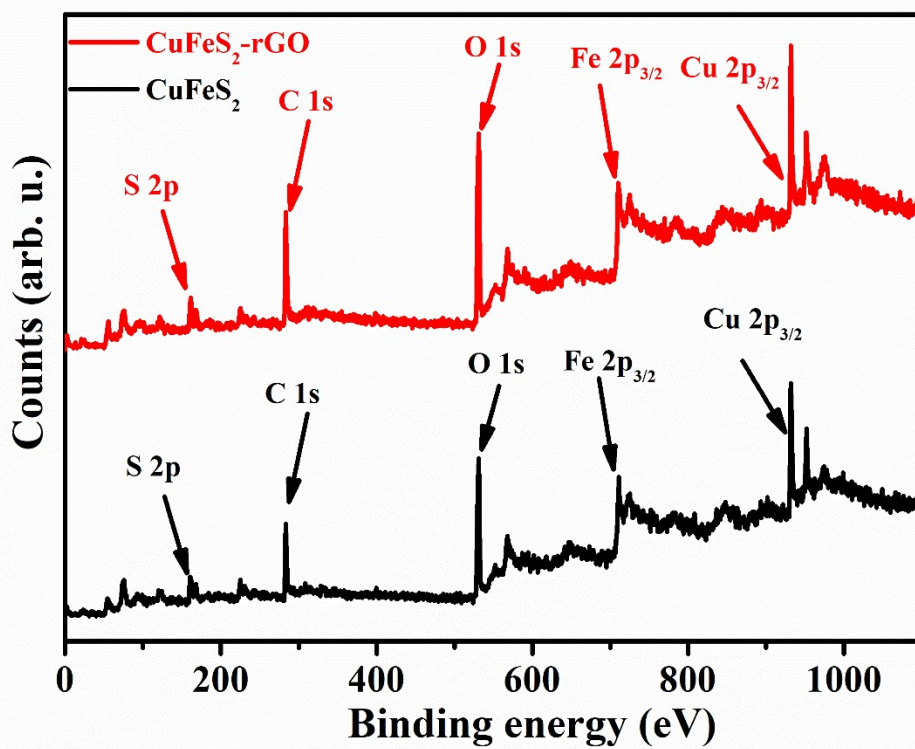

Figure S4 XPS survey spectra for bare CuFeS<sub>2</sub> and CuFeS<sub>2</sub>@rGO composite.

**Table S4** Physical properties of bare CuFeS<sub>2</sub> and CuFeS<sub>2</sub>@rGO composite.

| Sample name             | Surface area (m <sup>2</sup> /g) | Pore Diameter (nm) | Pore volume (CC/g) |
|-------------------------|----------------------------------|--------------------|--------------------|
| CuFeS <sub>2</sub>      | 6.297                            | 16.24              | 0.0237             |
| CuFeS <sub>2</sub> @rGO | 22.709                           | 24.05              | 0.1256             |

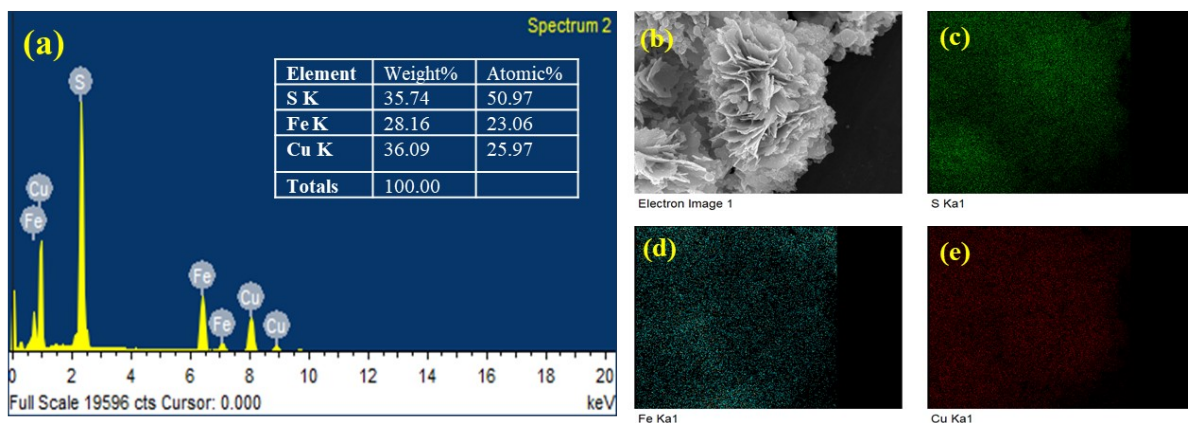

**Figure S5** (a) The EDX spectrum of  $\text{CuFeS}_2$ , (b) FE-SEM micrograph for elemental mapping of  $\text{CuFeS}_2$ , (c) Sulphur, (d) Iron, (e) Copper.

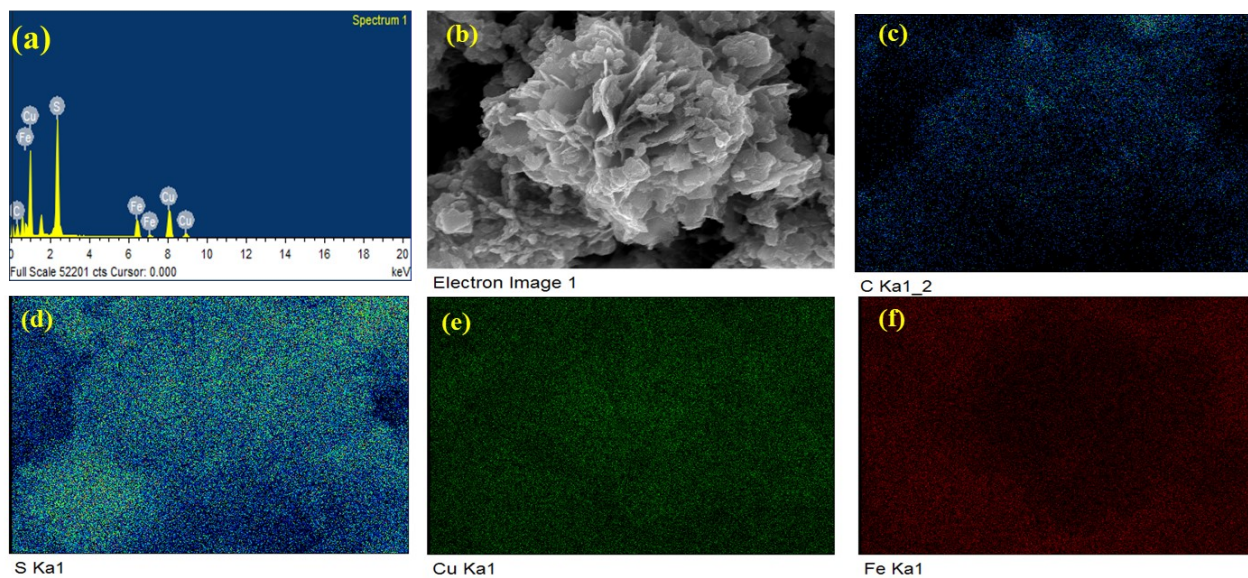

**Figure S6** (a) The EDX spectrum of  $\text{CuFeS}_2@\text{rGO}$ , (b) FE-SEM micrograph for elemental mapping of  $\text{CuFeS}_2@\text{rGO}$ , (c) carbon, (d) sulphur, (e) iron, (f) copper.

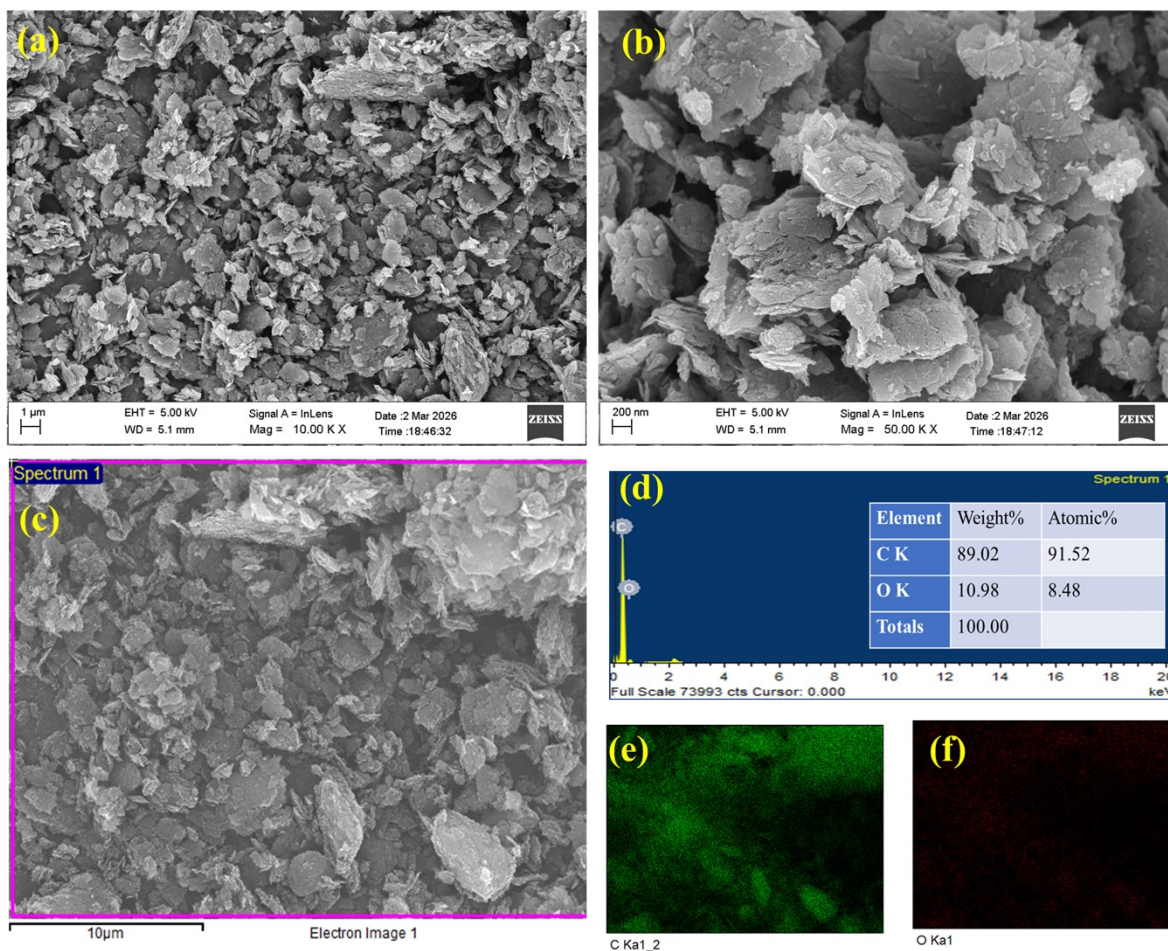

**Figure S7** (a) FESEM micrograph for the rGO at a magnification of (a)10 KX and (b) 50 KX. (c) Electronics image of rGO, The EDX spectrum of rGO, (c) FE-SEM micrograph for elemental mapping of rGO, (e) carbon, (f) oxygen.

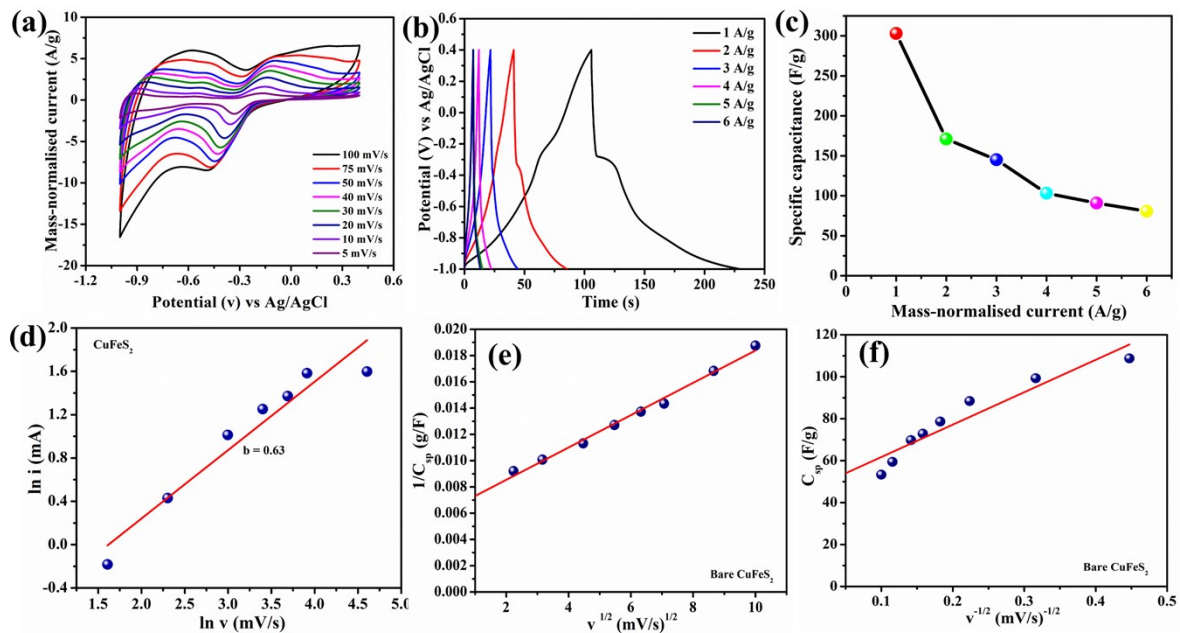

**Figure S8** Electrochemical analysis of prepared CuFeS<sub>2</sub>: **(a)** CV plots of CuFeS<sub>2</sub> electrode at various scan rates (i.e., 5 to 100 mV/s). **(b)** CD plots for the CuFeS<sub>2</sub> at different applied currents from 1 A/g to 6 A/g, **(c)** effect of different applied mass-normalised current values on the specific capacitance of the CuFeS<sub>2</sub>. Calculating the b-parameter using the power law equation. This parameter represents the slope of the linear relationship between the ln of the current and the ln of the scan rate in (d) CuFeS<sub>2</sub>. Trasatti plots for CuFeS<sub>2</sub> electrode. (e) shows the relationship between  $1/C_{sp}$  and  $v_{1/2}$ , (f) the relationship between  $C_{sp}$  and  $v$ .

**Table S5** Specific capacitance and specific capacity values for bare CuFeS<sub>2</sub>.

| Sr. no. | Sample             | Mass normalised current (A/g) | Specific Capacitance (F/g) | Specific Capacity (C/g) |
|---------|--------------------|-------------------------------|----------------------------|-------------------------|
| 1.      | CuFeS <sub>2</sub> | 1                             | 303.03                     | 424.32                  |
|         |                    | 2                             | 170.94                     | 239.32                  |
|         |                    | 3                             | 144.997                    | 203.00                  |
|         |                    | 4                             | 103.252                    | 144.55                  |
|         |                    | 5                             | 90.925                     | 127.30                  |
|         |                    | 6                             | 80.640                     | 112.90                  |

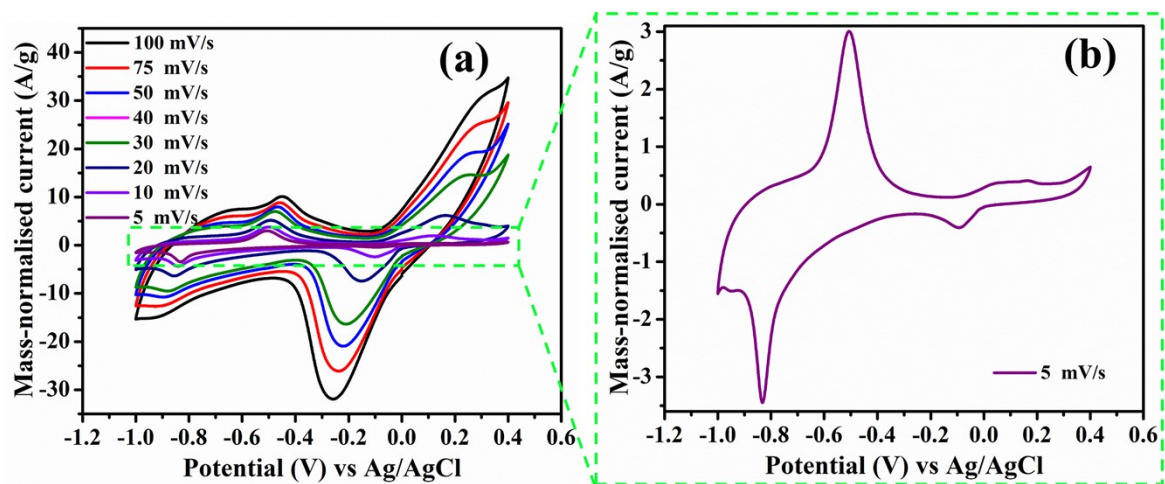

**Figure S9** (a) CV plots of CuFeS<sub>2</sub>@rGO composite electrode at various scan rates (i.e., 5 to 100 mV/s); (b) image displays an enlarged view of 5 mV/s for CuFeS<sub>2</sub>@rGO.

**Table S6** Specific capacitance and specific capacity values for CuFeS<sub>2</sub>@rGO.

| Sr. no. | Sample                  | Mass normalised current (A/g) | Specific Capacitance (F/g) | Specific Capacity (C/g) |
|---------|-------------------------|-------------------------------|----------------------------|-------------------------|
| 1.      | CuFeS <sub>2</sub> @rGO | 1.0                           | 1160.02                    | 1624.03                 |
|         |                         | 1.5                           | 0785.34                    | 1099.48                 |
|         |                         | 2.0                           | 0621.11                    | 869.55                  |
|         |                         | 2.5                           | 0496.03                    | 694.44                  |
|         |                         | 3.0                           | 0466.42                    | 653.00                  |
|         |                         | 3.5                           | 0343.47                    | 480.86                  |
|         |                         | 4.0                           | 0324.41                    | 454.17                  |
|         |                         | 4.5                           | 0243.24                    | 340.54                  |
|         |                         | 5.0                           | 0242.13                    | 339.00                  |

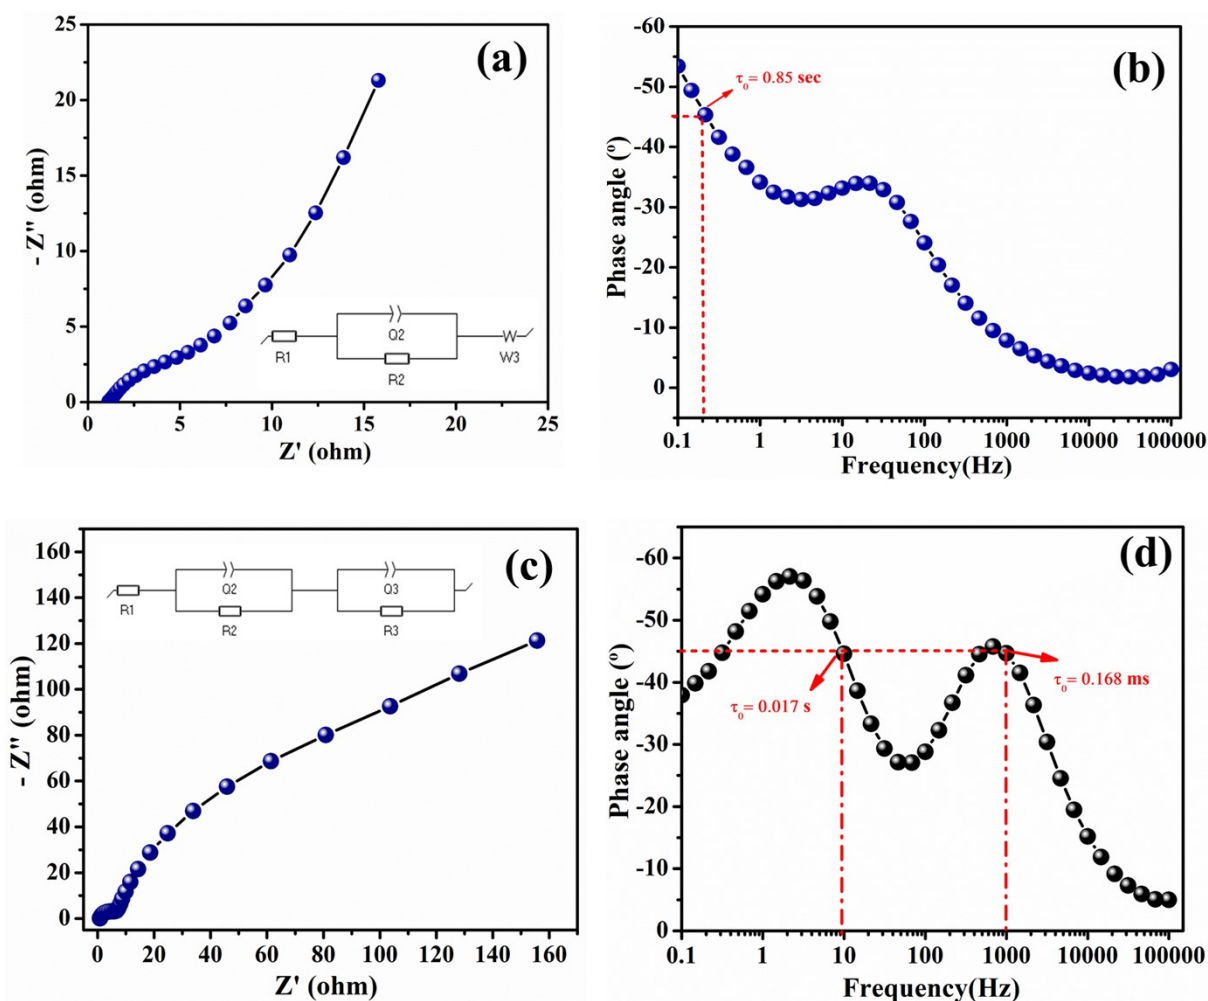

**Figure S10** (a) Nyquist plot for bare CuFeS<sub>2</sub> electrode, with inset showing the equivalent Randle circuit; (b) Bode plots for bare CuFeS<sub>2</sub> electrode with the relaxation time constant; (c) Nyquist plot for CuFeS<sub>2</sub>@rGO electrode, with inset showing the equivalent Randle circuit; (d) Bode plots for CuFeS<sub>2</sub>@rGO electrode with the relaxation time constant.

**Table S7** EIS fitted data for bare CuFeS<sub>2</sub> and CuFeS<sub>2</sub>@rGO composite.

| Sample name                         | $R_1$<br>(solution resistance)<br>( $\Omega$ ) | $R_2$<br>(charge-transfer resistance)<br>( $\Omega$ ) | $C_{dl}$<br>( $F \cdot s^{n-1}$ ) | $n_{dl}$ | $\tau_0$ (s)          |
|-------------------------------------|------------------------------------------------|-------------------------------------------------------|-----------------------------------|----------|-----------------------|
| <b>CuFeS<sub>2</sub></b>            | 1.05                                           | 14.66                                                 | $13.9 \times 10^{-6}$             | 0.90     | 0.85                  |
| <b>CuFeS<sub>2</sub>@rGO</b>        | 0.89                                           | 8.2                                                   | $4.4 \times 10^{-4}$              | 0.89     | $1.68 \times 10^{-4}$ |
| <b>CuFeS<sub>2</sub>@rGO (bulk)</b> | -                                              | -                                                     | $5.8 \times 10^{-3}$              | 0.84     | 0.017                 |

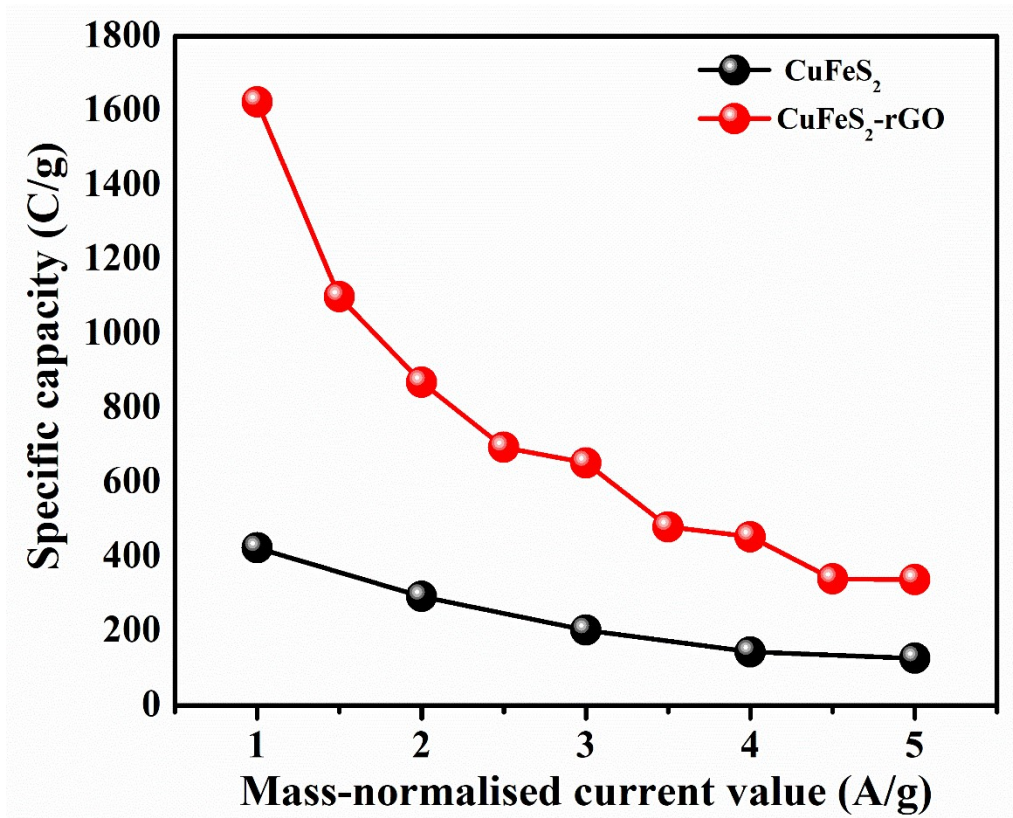

**Figure S11** Comparison of Specific capacity for bare CuFeS<sub>2</sub> electrode and CuFeS<sub>2</sub>@rGO composite.

**Table S8** EIS fitted data for the CuFeS<sub>2</sub>@rGO//CuFeS<sub>2</sub>@rGO composite device.

| <b>Sample name</b>                  | <b>R<sub>1</sub></b><br><b>(solution resistance)</b><br><b>(<math>\Omega</math>)</b> | <b>R<sub>2</sub></b><br><b>(charge-transfer resistance)</b><br><b>(<math>\Omega</math>)</b> | <b>C<sub>dl</sub></b><br><b>(F.s<sup>n-1</sup>)</b> | <b>n<sub>dl</sub></b> | <b>W</b><br><b>(Warburg element)</b><br><b>(<math>\Omega.s^{-1/2}</math>)</b> | <b><math>\tau_0</math> (s)</b> |
|-------------------------------------|--------------------------------------------------------------------------------------|---------------------------------------------------------------------------------------------|-----------------------------------------------------|-----------------------|-------------------------------------------------------------------------------|--------------------------------|
| <b>CuFeS<sub>2</sub>@rGO (SSDs)</b> | 1.18                                                                                 | 0.74                                                                                        | 3.2 x 10 <sup>-4</sup>                              | 0.93                  | 46.8                                                                          | 0.013                          |

**Table S9** Specific capacitance and specific capacity value for the symmetric cell device at different mass-normalised current values.

| Sr. no. | Sample                                                | Mass normalised current (A/g) | Specific Capacitance (F/g) | Specific Capacity (C/g) |
|---------|-------------------------------------------------------|-------------------------------|----------------------------|-------------------------|
| 1.      | CuFeS <sub>2</sub> @rGO//CuFeS <sub>2</sub> @rGO SSDs | 0.5                           | 64.94                      | 90.92                   |
|         |                                                       | 0.6                           | 42.58                      | 59.61                   |
|         |                                                       | 0.7                           | 35.77                      | 50.08                   |
|         |                                                       | 0.8                           | 29.75                      | 41.65                   |
|         |                                                       | 0.9                           | 24.39                      | 34.15                   |
|         |                                                       | 1.0                           | 20.96                      | 29.34                   |
|         |                                                       | 1.5                           | 14.13                      | 19.78                   |
|         |                                                       | 2.0                           | 9.61                       | 13.45                   |
|         |                                                       | 2.5                           | 6.64                       | 9.30                    |
|         |                                                       | 3.0                           | 5.03                       | 7.04                    |

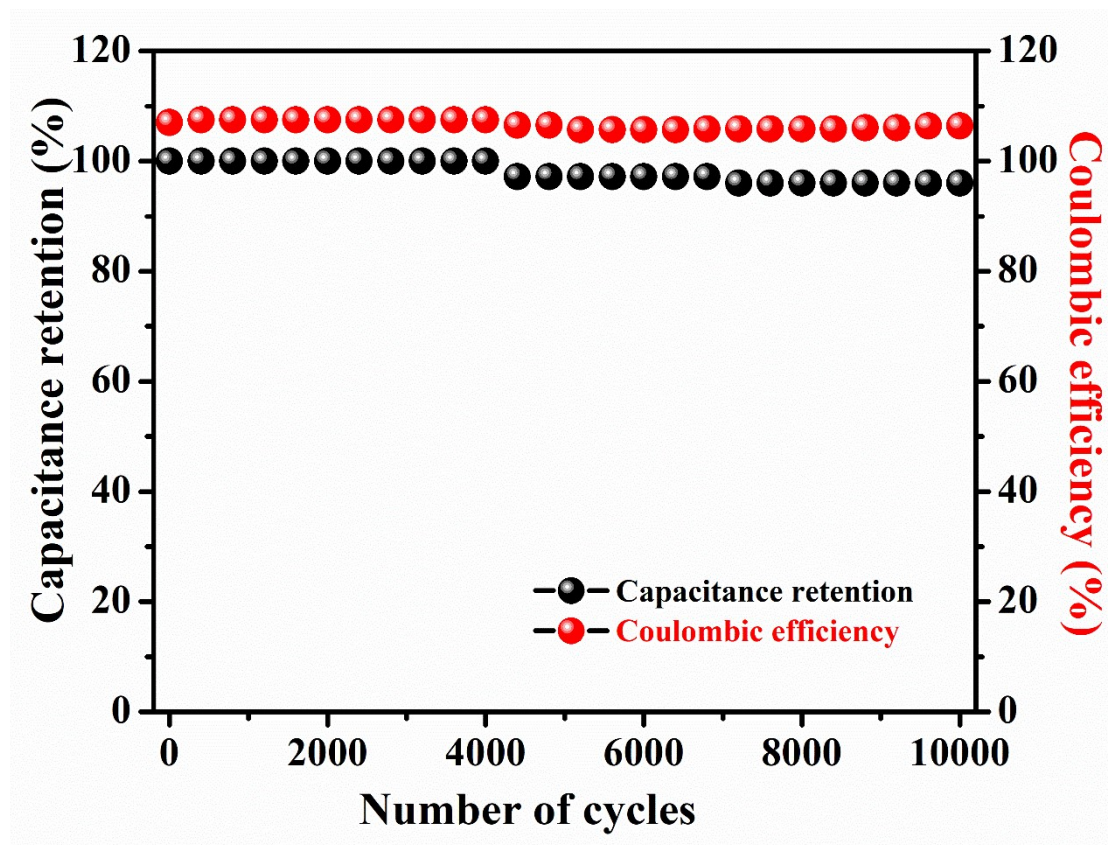

**Figure S12** Cyclic stability of the assembled device at the mass-normalised current value of 5 A/g, with the coulombic efficiency.

**Table S10** Comparison of supercapacitor performance of three-electrode measurements with published reports

| Sr. no.   | Electrode material                    | Method                 | Electrolyte                             | Specific capacitance (F/g) | Reference        |
|-----------|---------------------------------------|------------------------|-----------------------------------------|----------------------------|------------------|
| 1         | Ni <sub>3</sub> S <sub>2</sub> /MWCNT | Hydrothermal           | 2 MKOH                                  | 800                        | S1               |
| 2         | CoS/rGO                               | Hydrothermal           | 6 mol/L KOH                             | 550                        | S2               |
| 3         | CoS@rGO                               | Soak and hydrothermal  | 2 M KOH                                 | 849                        | S3               |
| 4         | rGO-CNT                               | Hummer method          | 6 M KOH                                 | 977                        | S4               |
| 5         | Co <sub>3</sub> S <sub>4</sub> @rGO   | Facial two-step method | 2 M KOH                                 | 675.9                      | S5               |
| 6         | RGO/FeS                               | Hydrothermal           | 2 M KOH                                 | 300                        | S6               |
| 7         | FeNiS <sub>2</sub> @rGO               | Hummer method          | 2 M KOH                                 | 1013                       | S7               |
| 8         | Fe <sub>3</sub> S <sub>4</sub> /RGO   | Solvothermal method    | 1 M KOH                                 | 560                        | S8               |
| 9         | rGO-Fe <sub>3</sub> O <sub>4</sub>    | Hydrothermal           | 1 M Na <sub>2</sub> SO <sub>4</sub>     | 182.2                      | S9               |
| <b>10</b> | <b>CuFeS<sub>2</sub>@rGO</b>          | <b>Hydrothermal</b>    | <b>1 M Na<sub>2</sub>SO<sub>4</sub></b> | <b>1160.02</b>             | <b>This work</b> |

**Table S11** Comparison of supercapacitor performance of assembled symmetric Supercapacitive device (SSD) with published reports.

| Sr. no.  | Device                              | Specific capacitance (F/g) | Specific energy density (Wh/kg) | Specific power density (W/kg) | Reference        |
|----------|-------------------------------------|----------------------------|---------------------------------|-------------------------------|------------------|
| 1        | NiS                                 | 11.15                      | 0.991                           | 261.11                        | S10              |
| 2        | FeS                                 | 4.62                       | 2.26                            | 726                           | S11              |
| 3        | AgFeS <sub>2</sub>                  | 331                        | 45                              | 0.261                         | S12              |
| 4        | CuFeS <sub>2</sub>                  | 34.18                      | 4.74                            | 1666                          | S13              |
| 5        | Cu <sub>4</sub> SnS <sub>4</sub>    | 34.9                       | 2.4                             | 0.291                         | S14              |
| 6        | Co <sub>3</sub> S <sub>4</sub> -rGO | 164 mF/cm <sup>2</sup>     | 1.09                            | 750                           | S15              |
| 7        | CuFeS <sub>2</sub> -CC              | 120                        | 16                              | 1146                          | S16              |
| 8        | NiS/MoS <sub>2</sub> @N-rGO         | 1028                       | 35.69                           | 601.8                         | S17              |
| <b>9</b> | <b>CuFeS<sub>2</sub>@rGO</b>        | <b>64.94</b>               | <b>17.67</b>                    | <b>3141.4</b>                 | <b>This work</b> |

**Reference:**

(S1) Dai, C.-S.; Chien, P.-Y.; Lin, J.-Y.; Chou, S.-W.; Wu, W.-K.; Li, P.-H.; Wu, K.-Y.; Lin, T.-W. Hierarchically Structured Ni<sub>3</sub>S<sub>2</sub>/Carbon Nanotube Composites as High

- Performance Cathode Materials for Asymmetric Supercapacitors. *ACS Appl. Mater. Interfaces* **2013**, *5* (22), 12168–12174. <https://doi.org/10.1021/am404196s>.
- (S2) Xu, L.; Lu, Y. One-Step Synthesis of a Cobalt Sulfide/Reduced Graphene Oxide Composite Used as an Electrode Material for Supercapacitors. **2015**. <https://doi.org/10.1039/C5RA11711A>.
- (S3) Song, X.; Tan, L.; Wang, X.; Zhu, L.; Yi, X.; Dong, Q. Synthesis of CoS@rGO Composites with Excellent Electrochemical Performance for Supercapacitors. *Journal of Electroanalytical Chemistry* **2017**, *794*, 132–138. <https://doi.org/10.1016/j.jelechem.2017.04.014>.
- (S4) Mohammadi, A.; Arsalani, N.; Tabrizi, A. G.; Moosavifard, S. E.; Naqshbandi, Z.; Ghadimi, L. S. Engineering rGO-CNT Wrapped Co<sub>3</sub>S<sub>4</sub> Nanocomposites for High-Performance Asymmetric Supercapacitors. *Chemical Engineering Journal* **2018**, *334*, 66–80. <https://doi.org/10.1016/j.cej.2017.10.029>.
- (S5) Wang, Q.; Jiao, L.; Du, H.; Si, Y.; Wang, Y.; Yuan, H. Co<sub>3</sub>S<sub>4</sub> Hollow Nanospheres Grown on Graphene as Advanced Electrode Materials for Supercapacitors. *J. Mater. Chem.* **2012**, *22* (40), 21387–21391. <https://doi.org/10.1039/C2JM34714H>.
- (S6) Zhao, C.; Shao, X.; Zhu, Z.; Zhao, C.; Qian, X. One-Pot Hydrothermal Synthesis of RGO/FeS Composite on Fe Foil for High Performance Supercapacitors. *Electrochimica Acta* **2017**, *246*, 497–506. <https://doi.org/10.1016/j.electacta.2017.06.090>.
- (S7) Miah, M.; Hota, P.; Mondal, T. K.; Chen, R.; Saha, S. K. Mixed Metal Sulfides (FeNiS<sub>2</sub>) Nanosheets Decorated Reduced Graphene Oxide for Efficient Electrode Materials for Supercapacitors. *Journal of Alloys and Compounds* **2023**, *933*, 167648. <https://doi.org/10.1016/j.jallcom.2022.167648>.

- (S8) Karuppasamy, M.; Muthu, D.; Haldorai, Y.; Rajendra Kumar, R. T. Solvothermal Synthesis of Fe<sub>3</sub>S<sub>4</sub>@graphene Composite Electrode Materials for Energy Storage. *Carbon Lett.* **2020**, *30* (6), 667–673. <https://doi.org/10.1007/s42823-020-00139-9>.
- (S9) Wang, H.; Xu, X.; Wang, C.; Neville, A.; Hua, Y. Fundamental Insight into the Degradation Mechanism of an rGO-Fe<sub>3</sub>O<sub>4</sub> Supercapacitor and Improving Its Capacity Behavior via Adding an Electrolyte Additive. *Energy Fuels* **2021**, *35* (9), 8406–8416. <https://doi.org/10.1021/acs.energyfuels.1c00653>.
- (S11) Karade, S. S.; Dwivedi, P.; Majumder, S.; Pandit, B.; Sankapal, B. R. First Report on a FeS-Based 2 V Operating Flexible Solid-State Symmetric Supercapacitor Device. *Sustain. Energy Fuels* **2017**, *1* (6), 1366–1375. <https://doi.org/10.1039/C7SE00165G>.
- (S12) Abdullah, M.; Alahmari, S. D.; Aman, S.; Ejaz, S. R.; Haleem, Y. A.; Gouadria, S.; Al-Sehemi, A. G.; Henaish, A. M. A.; Ahmad, Z.; Farid, H. M. T. Facile Fabrication of AgFeS<sub>2</sub> Nanostructure via Hydrothermal Route for Supercapacitor Application. *J. Energy Storage* **2024**, *77*, 109875. <https://doi.org/10.1016/j.est.2023.109875>.
- (S13) Sahoo, S.; Pazhamalai, P.; Mariappan, V. K.; Veerasubramani, G. K.; Kim, N.-J.; Kim, S.-J. Hydrothermally Synthesized Chalcopyrite Platelets as an Electrode Material for Symmetric Supercapacitors. *Inorg. Chem. Front.* **2020**, *7* (7), 1492–1502. <https://doi.org/10.1039/C9QI01335K>.
- (S14) Lokhande, A. C.; Patil, A.; Shelke, A.; Babar, P. T.; Gang, M. G.; Lokhande, V. C.; Dhawale, D. S.; Lokhande, C. D.; Kim, J. H. Binder-Free Novel Cu<sub>4</sub>SnS<sub>4</sub> Electrode for High-Performance Supercapacitors. *Electrochimica Acta* **2018**, *284*, 80–88. <https://doi.org/10.1016/j.electacta.2018.07.170>.
- (S15) Patil, S. J.; Kim, J. H.; Lee, D. W. Graphene-Nanosheet Wrapped Cobalt Sulphide as a Binder Free Hybrid Electrode for Asymmetric Solid-State Supercapacitor. *J. Power Sources* **2017**, *342*, 652–665. <https://doi.org/10.1016/j.jpowsour.2016.12.096>.

- (S16) Rupa Ranjani, P.; Anjana, P. M.; Rakhi, R. B. Solvothermal Synthesis of CuFeS<sub>2</sub> Nanoflakes as a Promising Electrode Material for Supercapacitors. *J. Energy Storage* **2021**, *33*, 102063. <https://doi.org/10.1016/j.est.2020.102063>.
- (S17) Xu, X.; Zhong, W.; Zhang, X.; Dou, J.; Xiong, Z.; Sun, Y.; Wang, T.; Du, Y. Flexible Symmetric Supercapacitor with Ultrahigh Energy Density Based on NiS/MoS<sub>2</sub>@N-rGO Hybrids Electrode. *J. Colloid Interface Sci.* **2019**, *543*, 147–155. <https://doi.org/10.1016/j.jcis.2019.02.054>.
- (S18) Barkat, L.; Hamdadou, N.; Morsli, M.; Khelil, A.; Bernède, J. C. Growth and Characterization of CuFeS<sub>2</sub> Thin Films. *J. Cryst. Growth* **2006**, *297* (2), 426–431. <https://doi.org/10.1016/j.jcrysgro.2006.10.105>.
- (S19) Fatimah, S.; Ragadhita, R.; Husaeni, D. F. A.; Nandiyanto, A. B. D. How to Calculate Crystallite Size from X-Ray Diffraction (XRD) Using Scherrer Method. *ASEAN J. Sci. Eng.* **2022**, *2* (1), 65–76. <https://doi.org/10.17509/ajse.v2i1.37647>.
